# Supplementary material
Source: publisher site journal article supplement (https://www.dovepress.com/get_supplementary_file.php?f=259432.docx)
Supplement: Supplementary file 2 [file get_supplementary_file.php]

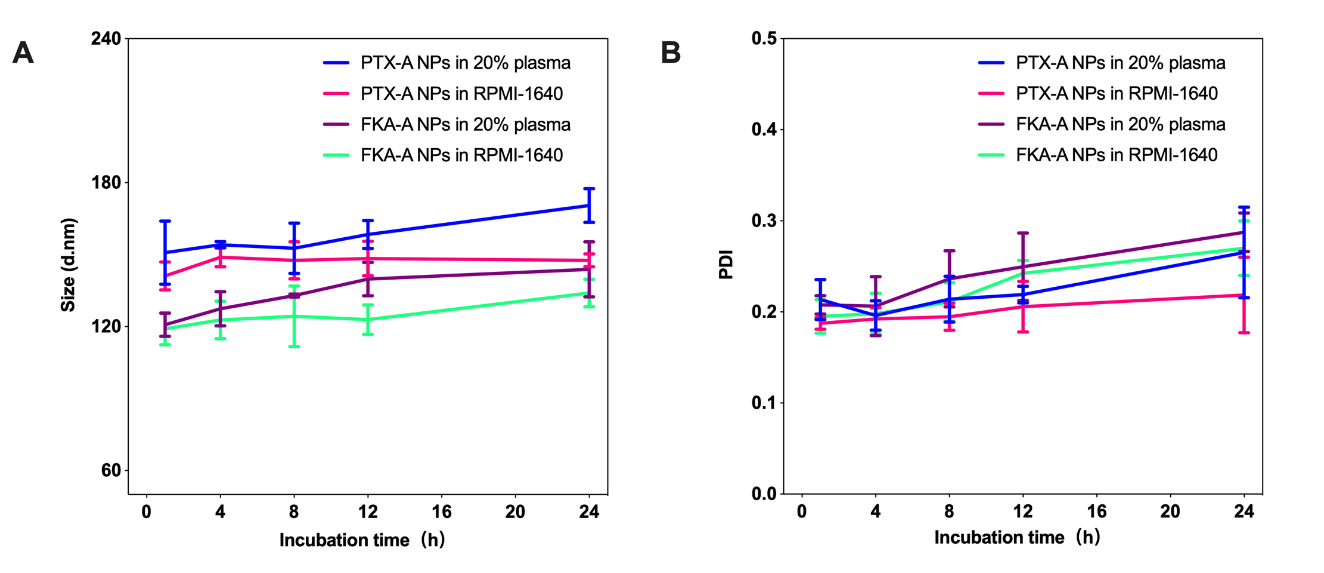


Figure S1.Stability evaluation of PTX-A NPs and FKA-A NPs . (A) Particle size and (B) PDI with different media for 24 h at 37 ± 0.5◦C.


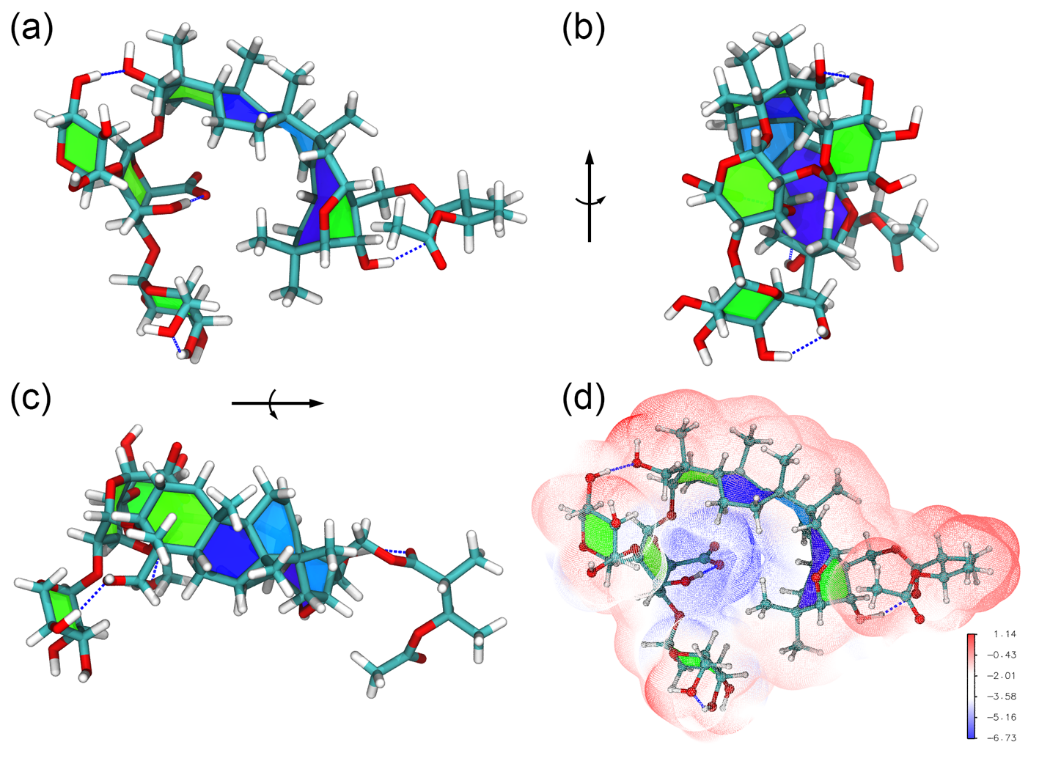


Figure S2.The lowest energy conformation of molecule Aes afer geomoetry optimization at PBE0/def2-SVP level with consideration of solvent environment using SMD model of water.


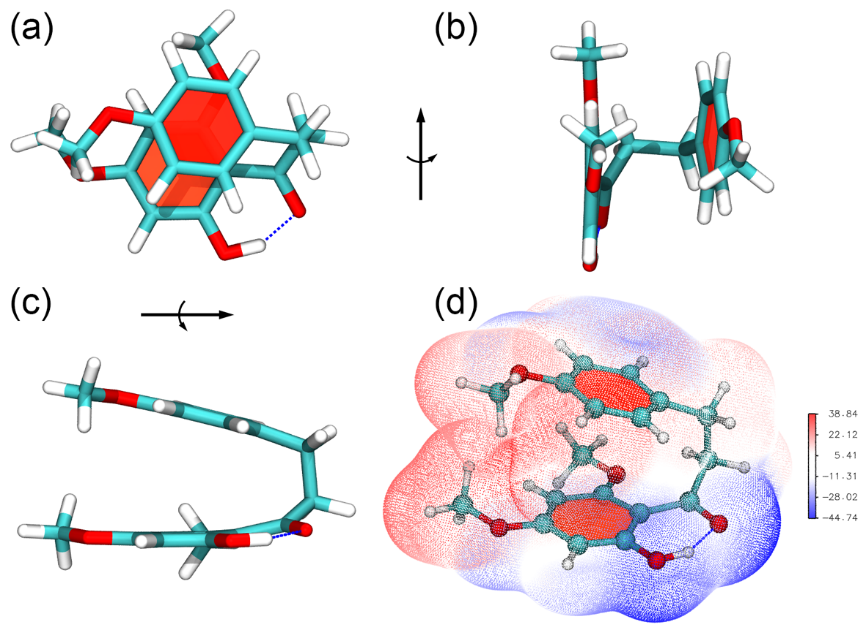


Figure S3. The lowest energy conformation of molecule FKA afer geomoetry optimization at PBE0/def2-SVP level with consideration of solvent environment using SMD model of water.


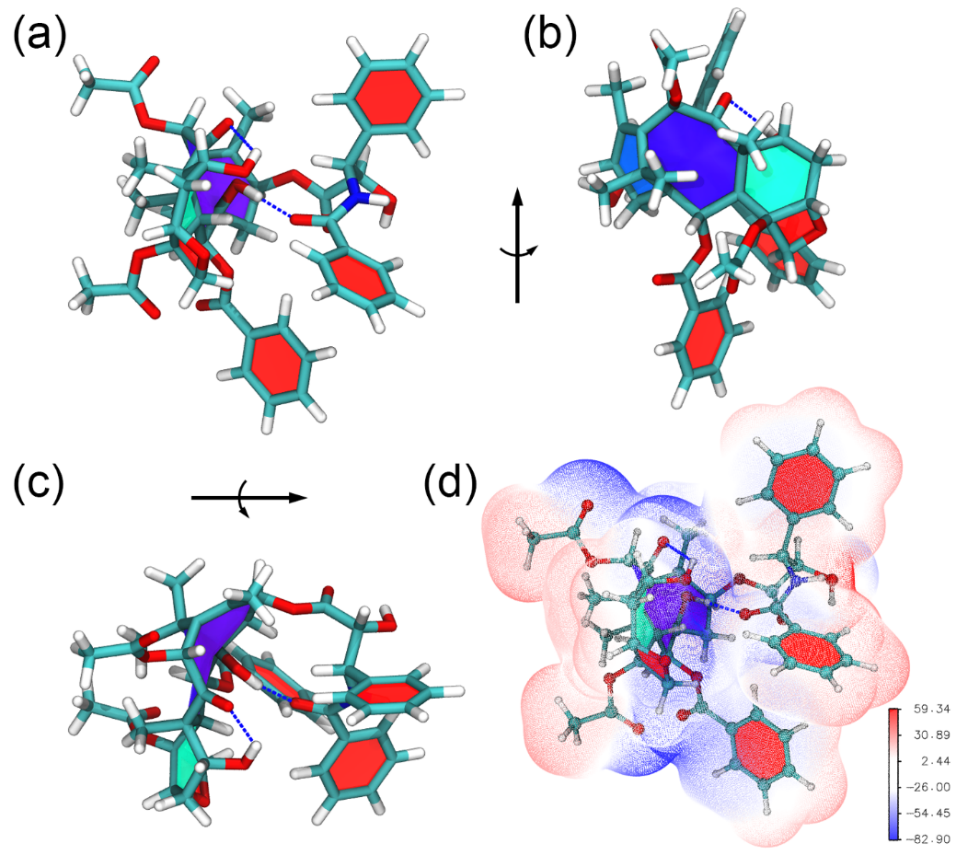


Figure S4. The lowest energy conformation of molecule PTX afer geomoetry optimization at PBE0/def2-SVP level with consideration of solvent environment using SMD model of water.


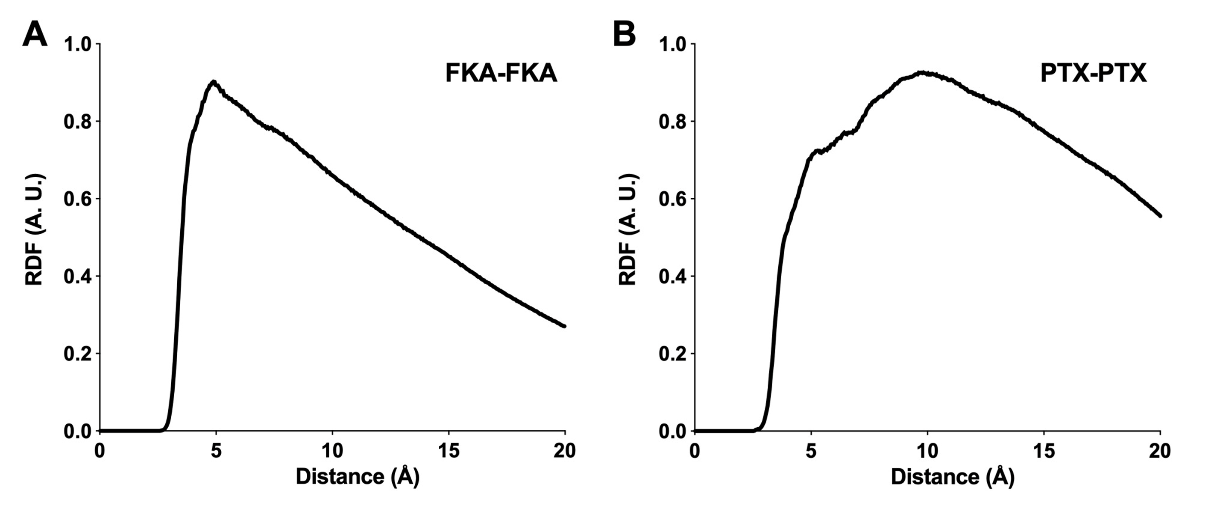


Figure S5. Averaged inter-molecular radial distribution functions for FKA (A) in Aes: FKA = 5:17 and PTX (B) in Aes:PTX= 6:8 system.


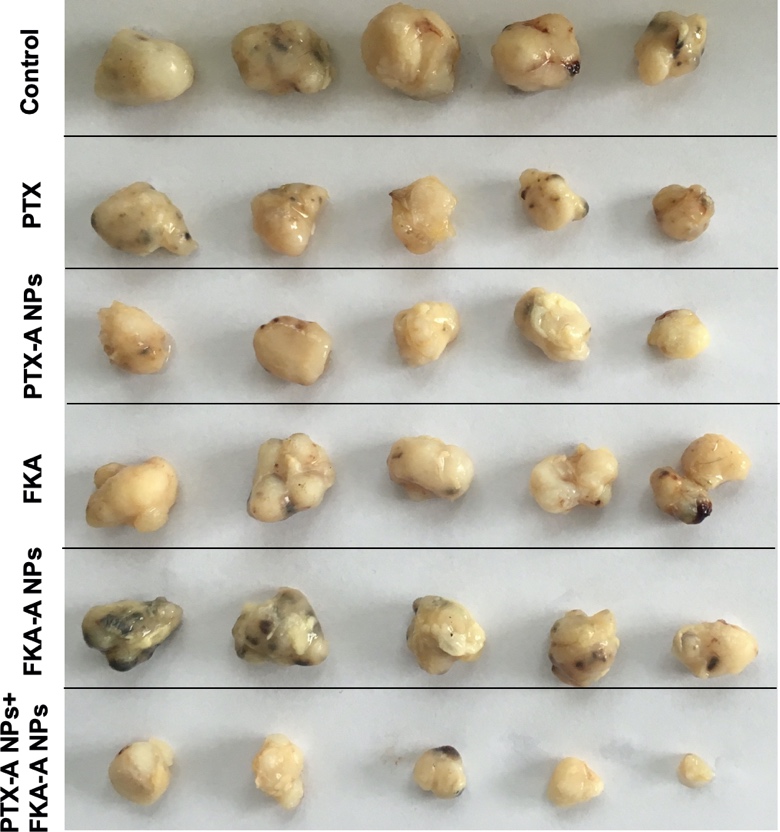


Figure S6. Photographs of tumors isolated from different groups.


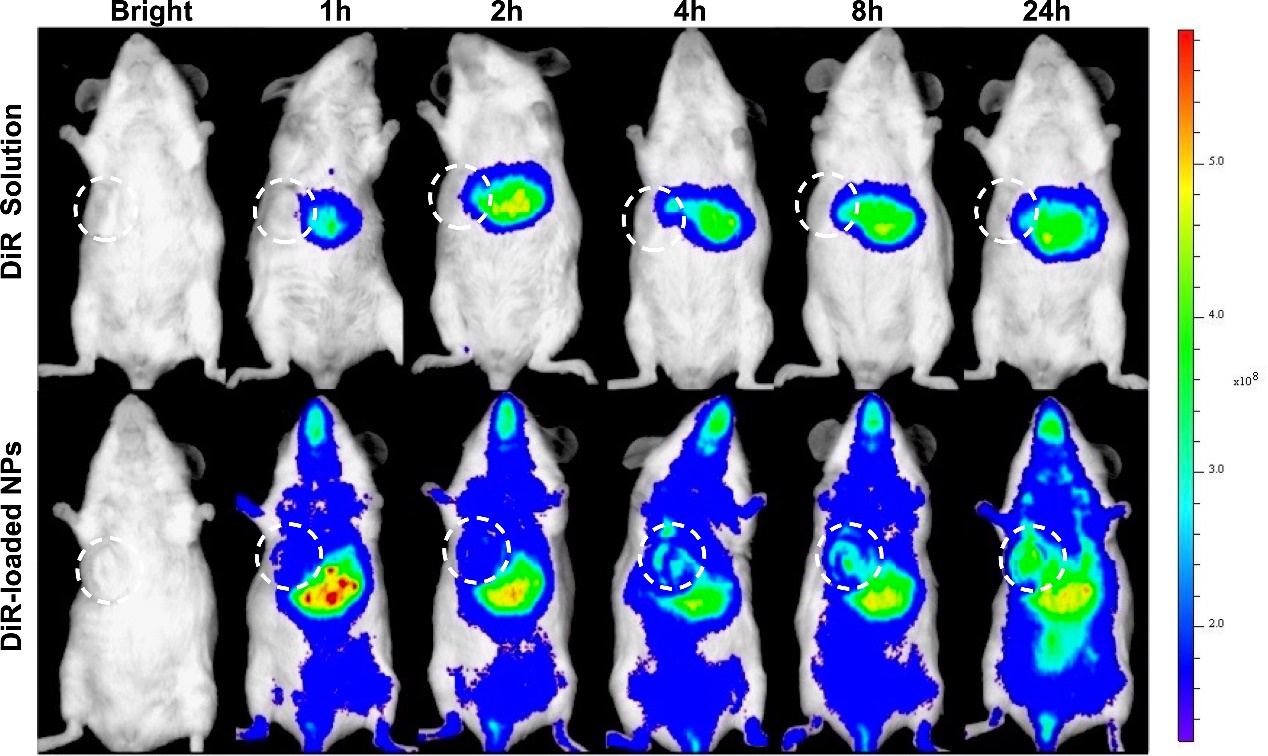


Figure S7. Real time fluorescence images of tumor-bearing mice post-injection of DiR solutions and DiR-loaded NPs. Tumors were marked with white circles.


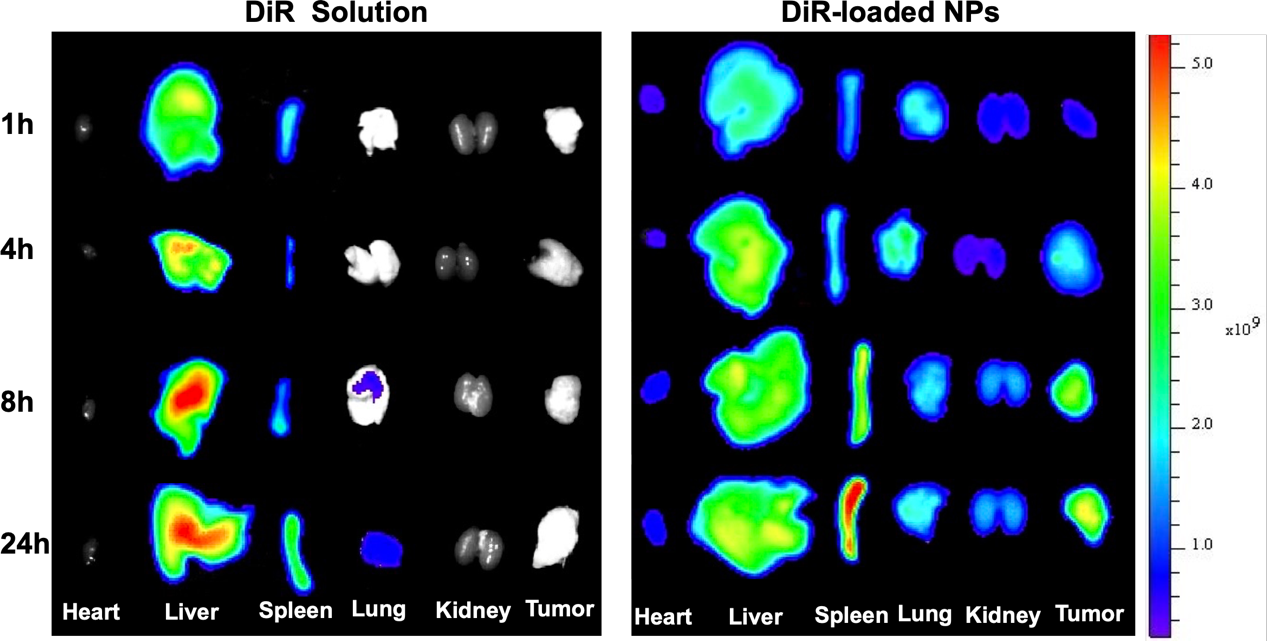


Figure S8. *In vivo* biodistribution of DiR-loaded NPs. *Ex vivo* fluorescence images of main organs and tumors after administration with DiR solutions and DiR-loaded NPs at different time points.
